# Supplementary material for: An experience selecting quality features of apps for people with disabilities using abductive approach to explanatory theory generation
Source: PeerJ Comput Sci. 2021 Aug 2;7:e595. doi: 10.7717/peerj-cs.595 (PMC8356648; doi:10.7717/peerj-cs.595)
Supplement: Supplemental Information 1 [file peerj-cs-07-595-s001.xlsx]

## Sheet: Apps - MARS
Apps Name - MARS	1. Entertainment	2. Interest	3. Customization	4. Interactivity	5. Target group	6. Performance	7. Ease of use	8. Navigation	9. Gestural design	10. Layout	11. Graphics	12. Visual appeal	13. Accuracy of app description	14. Goals	15. Quality of information	16. Quantity of information	17. Visual information	18. Credibility
BLINDFOLD 3-D TIC TAC TOE	4	4	3	3	4	3	4	4	4	5	2	2	5	4	4	4	3	5
BLINDFOLD BIRD SONGS	4	4	3	3	4	5	4	4	5	4	2	2	5	4	5	4	5	5
BLINDFOLD BOP GESTURE GAME	5	5	4	5	4	5	5	5	5	4	5	3	4	5	4	4	4	5
BLINDFOLD CONNECT	4	5	4	5	5	4	4	5	5	4	3	3	5	5	4	4	5	5
BLINDFOLD FIREWORKS	3	3	3	4	4	5	4	4	5	4	3	3	4	3	4	4	4	4
BLINDFOLD RACER	5	5	5	4	4	5	5	5	5	4	3	3	5	5	4	5	4	5
BLINDFOLD SEA BATTLE	4	4	3	4	5	5	4	5	4	4	3	3	4	4	4	5	4	5
BLINDFOLD SHAPE PUZZLE	4	4	3	5	4	4	4	5	4	4	3	3	4	4	5	4	5	4
BLINDFOLD SONG NAME	4	5	3	4	5	4	5	5	4	4	3	3	4	4	5	4	5	4
BLINDFOLD SOUND SEARCH	4	4	3	4	5	4	4	5	5	4	3	3	4	4	4	5	4	4
BLINDFOLD SUDOKU	3	4	3	4	4	4	4	5	5	4	3	3	4	4	5	4	5	4
CROSS FINGERS	5	5	5	5	4	5	5	5	4	5	4	4	5	5	4	5	5	4
DIBUJA EL ABECEDARIO	4	4	5	4	5	5	5	5	5	4	5	4	5	5	4	5	5	5
DIFERENCIA ANIMALES - ¡BUSCA Y ENCUENTRA!	4	4	5	5	5	5	5	5	5	4	4	4	4	5	4	5	5	5
JUEGO DE CLASIFICACIÓN	4	4	3	4	4	4	5	5	5	4	3	4	4	5	4	4	4	5
MEMORA - CLASSIC	4	5	4	4	5	5	5	5	5	4	4	4	5	4	5	4	4	5
MEMORA 2	5	5	4	4	5	4	5	5	5	5	4	5	4	5	4	5	5	5
OLDSCHOOL BLOCKS	5	5	5	5	4	5	4	4	5	5	4	4	5	5	5	4	4	5
PEEKABOO	3	3	3	3	4	3	4	4	4	3	4	4	3	4	4	4	4	5
ROMPECABEZAS DE FORMAS / Shapes Jigsaw	4	4	4	4	5	5	4	4	5	5	4	5	5	5	5	4	5	5
SABANA: PUZZLES DE ANIMALES	4	5	4	5	4	4	5	4	4	5	5	4	5	5	4	4	4	5
SPIKE MATH	5	4	4	4	4	4	5	4	5	4	4	5	5	4	5	4	5	5
TANGRAM KING	4	4	3	4	4	3	4	4	4	3	4	4	4	4	5	4	4	4
THE CALCULATOR	4	4	5	4	5	4	4	5	4	5	4	4	4	5	4	5	4	4
THINGS THAT GO TOGETHER - MONTESSORI	4	4	3	4	4	4	5	5	5	4	3	4	4	5	4	4	4	5
ABC 123 LECTURA Y ESCRITURA	3	3	4	3	4	3	4	4	4	4	4	4	4	5	5	4	4	5
SOYVISUAL LECTOESCRITURA / #Soyvisual	4	5	4	4	5	5	5	5	5	4	4	4	5	4	5	4	4	5
SOYVISUAL APP	5	5	4	5	4	5	5	5	4	5	4	5	5	5	5	5	5	5
SOYVISUAL LÉXICO - SEMÁNTICA	5	5	5	5	5	5	5	5	5	5	5	5	5	5	5	5	5	5
TRADUCTOR DE GOOGLE	4	4	4	5	4	5	5	5	5	5	4	5	4	4	5	5	5	5
TUX PAINT	4	4	3	4	5	4	5	5	5	4	4	5	5	5	4	4	4	5
ZOOLA ANIMALES LITE	4	4	5	4	5	4	4	5	4	5	4	4	5	4	5	4	4	4
AB MATH EXPERTO LITE	4	4	3	4	3	4	4	3	4	4	4	4	3	4	4	3	4	5
APRENDER A CONTAR 123 PARA NIÑOS	4	4	4	5	4	5	4	4	5	4	5	4	5	4	4	4	5	4
BLA BLA BLA	5	4	4	5	4	4	5	5	4	4	4	4	4	5	4	4	4	5
CALCULADORA	5	5	4	4	5	4	5	5	5	5	4	5	4	5	4	5	5	5
CALCULADORA	5	5	4	4	5	4	5	5	5	5	4	5	4	5	4	5	5	5
CHATTERPIX KIDS	4	4	3	4	4	4	5	5	5	4	3	4	4	5	4	4	4	5
DÍA A DÍA	4	4	5	4	5	4	5	5	5	5	4	5	4	5	4	4	4	5
EL CUERPO HUMANO LITE	5	4	5	4	5	5	4	4	5	4	5	4	5	5	4	5	4	5
IWRITEMUSIC	5	4	4	4	4	4	5	4	4	5	4	5	5	4	5	4	4	5
KEEZY CLASSIC	4	4	5	4	5	4	5	5	5	5	5	4	4	4	5	4	4	4
LEO CON LULA	4	4	3	4	4	3	3	4	3	4	4	3	4	4	4	4	4	4
MATCH THE DOTS	4	4	5	4	5	4	5	5	4	5	4	5	4	5	5	4	5	4
MY MATH APP	4	5	4	4	5	5	5	4	5	4	4	4	5	5	5	4	4	5
ROMPECABEZAS DE MADERA: NAVIDAD	5	4	4	4	4	5	4	5	4	5	4	4	5	5	5	4	5	5
SONIDOS DE ANIMALES	4	3	4	4	4	4	4	4	4	5	4	4	4	5	5	4	4	5
STOCKFISH CHESS	4	4	5	4	4	5	4	4	5	5	4	5	4	4	5	4	5	5
100 BOTONES	5	4	5	4	5	5	5	4	5	5	5	5	4	5	5	5	4	5
4 EN RAYA	5	4	4	5	4	4	4	5	5	4	5	4	5	5	5	4	4	5
CAMIONES Y VEHÍCULOS DE CONSTRUCCIÓN	4	3	4	4	4	4	4	4	4	4	4	4	4	5	5	5	4	5
MEBOP MAESTRO: BURBUJAS MUSICALES	5	4	5	4	5	4	4	5	5	5	4	4	5	4	5	4	4	4
WAVEBAND	3	3	4	4	4	4	4	4	4	4	4	4	4	5	4	4	4	5
WIDGIT GO BASIC	4	4	5	4	4	4	5	4	5	4	4	4	5	5	5	5	4	5
123 JUEGOS DE NAVIDAD	4	4	3	4	4	4	5	5	5	4	3	4	4	5	4	4	4	5
94 SEGUNDOS	5	5	4	5	5	5	4	5	4	5	5	5	5	4	5	5	5	5
ABC DE LOS ANIMALES	4	4	5	4	4	4	4	5	4	4	5	4	5	5	4	4	5	5
ALFABETO 3D	3	3	4	4	4	4	4	4	4	4	4	4	4	5	5	4	5	5
¿CUÁL ES EL DIFERENTE? 1 (WHAT'S DIFF 1)	4	5	4	4	5	4	4	5	5	5	4	5	4	5	4	5	4	5
¿CUÁL ES EL DIFERENTE? 2 (WHAT'S DIFF 2)	4	4	5	4	5	4	5	5	5	4	4	5	4	5	4	5	5	5
¿CUÁL ES EL DIFERENTE? 3 (WHAT'S DIFF 3)	5	4	4	5	5	4	5	5	4	5	4	5	4	5	4	5	5	5
AUTISM MIND	4	3	4	4	4	4	5	5	4	4	5	4	5	5	5	5	5	5
OTSIMO	4	4	4	5	4	5	5	5	4	5	4	5	5	4	5	4	5	5
MERCK PTE	5	5	4	5	5	5	4	5	4	5	4	5	4	4	4	5	4	5
STOPIT	4	4	4	5	4	4	4	5	4	4	4	4	4	5	4	5	4	4
ONENOTE	4	4	4	5	4	4	5	4	5	4	4	4	5	4	5	4	5	4
WHAT´S MY PAIR 2 / TODDLER PUZZLE GAMES POR KIDS	4	4	4	4	4	4	4	4	4	4	4	4	5	5	5	5	4	4
ASISTENTE DE VOZ GOOGLE	5	5	5	5	5	5	5	4	5	4	5	5	5	5	5	5	5	5
BUILD IT UP	4	4	3	4	4	4	5	5	5	4	3	4	4	5	4	4	4	5
SERIES 1	5	4	5	5	5	4	4	5	5	5	4	4	4	4	5	5	5	5
ADORO LAS PAPAS	5	4	5	5	4	4	4	4	5	5	4	5	4	5	5	5	5	4
EL REY DE LAS MATEMÁTICAS	4	4	4	4	5	5	4	5	5	4	4	4	5	5	5	5	5	5
VEO VEO CON LOLA	4	4	5	5	4	4	4	5	4	5	4	4	5	5	4	4	4	5
CAUSE AND EFECT SENSORY	4	4	4	4	4	5	5	5	5	4	4	5	5	4	4	5	5	4
ANONYMOUS ALERTS	5	4	5	4	4	4	4	5	5	4	5	5	5	4	4	4	5	4
MATRIX GAME 3	5	5	5	4	5	5	4	5	4	5	5	4	5	5	5	5	4	5
GEOMETRY PAD	4	5	4	4	4	4	5	4	4	4	5	5	4	4	5	5	4	4
DICCIONARIO WORDREFERENCE	4	4	4	4	4	4	5	5	5	5	5	5	5	5	5	5	5	5
B-RESOL	4	5	5	5	4	4	4	4	4	5	5	5	4	5	5	4	5	4
APRENDE LAS HORAS	3	3	4	4	4	4	4	4	4	4	4	4	4	5	4	4	4	4
FLOW FREE	4	5	5	5	5	5	5	5	4	4	4	4	4	5	5	4	5	4
LAZZUS	4	4	4	4	4	4	5	5	4	5	5	4	5	4	5	5	5	5
CLASIFICA 1 (Sort it out 1 - for toddlers)	4	5	5	5	5	5	4	4	4	5	5	5	4	4	5	5	5	5
CLASIFICA 2 (Sort it out 2 - for toddlers)	5	4	4	4	4	4	5	5	5	5	4	4	5	5	4	5	5	5
IFUNFACE	4	4	4	4	4	4	4	5	5	5	5	4	4	4	4	5	5	5
LETRAS MÁGICAS	5	5	5	5	4	5	4	5	4	5	5	5	5	4	4	4	5	5
MATCH IT UP 1	4	4	4	4	4	4	5	5	5	4	4	4	4	5	4	4	4	5
MATCH IT UP 2	4	4	4	4	4	5	5	5	5	5	5	5	4	5	4	5	5	5
MATRIX GAME 1	5	5	5	5	5	4	5	5	5	5	4	5	5	5	5	5	5	5
MATRIX GAME 2	5	5	5	5	5	5	5	5	5	5	5	5	5	4	5	5	5	5
MEMO FLASH	4	4	4	4	4	5	5	5	4	4	5	4	4	4	5	4	5	4
PUZZLE ME 2	4	4	4	4	4	4	4	4	4	5	5	5	5	5	4	4	5	4
PUZZLES DE VEHÍCULOS	5	4	4	4	4	4	4	4	4	5	5	5	4	5	5	5	5	4
SERIES 2	5	5	5	5	4	4	5	4	4	4	4	5	5	4	5	5	5	5
SERIES 3	4	4	4	4	4	4	4	4	5	5	5	5	5	4	5	5	5	5
SUSTANCIAS QUÍMICAS	5	5	5	5	5	5	5	4	5	5	4	5	5	4	5	4	5	4
TAP MATH	4	4	4	4	5	4	5	5	4	5	5	4	5	5	4	4	4	5
ABC PRESCHOOL	4	5	4	4	4	5	5	5	5	4	4	4	4	5	4	4	4	5
BUILD A TRUCK	5	5	5	5	5	5	5	4	4	4	4	4	5	5	5	4	5	5
COMUNICADOR TÁCTIL ONCE	5	5	5	5	5	5	5	5	5	5	4	4	5	4	5	5	4	5
FISH SCHOOL	4	5	4	5	4	4	4	4	5	5	4	5	5	5	5	5	5	4
PEPI BATH LITE	4	4	4	4	4	4	5	4	5	5	4	5	4	4	4	5	4	4
PET BINGO	4	4	4	4	5	5	5	4	4	4	5	5	4	4	4	4	5	5
BRAIN PUZZLE PRO	5	4	5	5	5	5	5	4	4	4	4	4	5	4	5	5	5	4
CAILLOU - JUEGOS EDUCATIVOS / APRENDE CON CAILLOU	5	5	5	5	5	5	5	4	4	4	5	4	5	4	4	4	4	4
ESCAPE LOGAN ESTATE	4	4	4	4	4	4	5	5	5	5	4	4	5	5	5	5	4	4
ROSCORAE	5	5	5	5	4	4	4	4	5	5	5	5	5	5	4	4	4	4
SPATIAL LINE PUZZLES	5	5	5	5	5	5	4	4	4	5	5	4	4	4	4	4	4	5
YHOMEWORK - MATH SOLVER	5	4	4	4	4	4	4	5	5	4	5	4	5	4	4	5	5	5
LEO CON GRIN / APRENDER A LEER 1 CON GRIN	5	5	5	5	5	4	4	4	5	4	4	4	4	4	4	4	4	5
MATEMÁTICAS CON GRIN 456	4	4	4	4	4	4	5	5	5	5	4	5	4	4	4	4	4	5
FANTASTIC 4 IN A ROW	5	5	5	5	4	4	4	4	4	4	4	4	5	5	5	5	4	5
KELY SUMAR Y RESTAR (VERSION MEJORADA " MATEMÁTICAS CON GRIN 456" )	5	5	4	4	5	4	5	5	5	5	4	5	4	5	4	5	5	5
GEOGEBRA	5	5	5	5	5	5	5	5	4	5	5	4	5	5	5	5	5	5
ARBOLAPP	4	5	5	5	5	4	4	4	4	4	5	5	5	5	5	4	4	5
DICCIONARIO RAE	5	5	5	4	5	4	4	5	5	4	5	5	4	5	4	5	5	5
DUOLINGO	5	5	5	5	5	4	5	5	5	5	5	5	5	5	5	5	5	5
JOSÉ APRENDE cuentos	4	5	5	5	5	5	4	4	5	5	5	4	4	5	5	5	5	5
OBJETOS ESCONDIDOS - MYSTERY SOCIETY	4	5	5	5	5	4	4	4	4	4	5	5	5	5	5	5	4	5
GCOMPRIS	5	5	5	5	5	5	4	4	4	4	4	4	5	5	5	5	4	5
MATCH IT UP 3	5	4	4	4	4	4	5	5	5	4	4	4	4	5	4	4	4	5
VEHÍCULOS ROMPECABEZAS PARA NIÑOS PEQUEÑOS	4	5	5	5	5	4	4	4	4	5	5	4	4	5	5	4	4	5
CÁLCULO MENTAL	4	4	2	1	5	5	5	5	4	4	3	4	3	4	4	4	4	5
CÁLCULO DEL MCM Y DEL MCD	4	4	3	1	5	5	4	4	5	4	4	5	5	5	5	5	5	5
14	5	5	2	1	3	4	4	4	4	4	4	4	3	3	3	3	3	3
¿CÓMO ESTÁS?	4	4	5	4	4	4	5	4	5	5	4	4	5	5	4	3	5	5
¿CONOCES LAS SEÑALES?	3	3	2	1	5	3	5	5	5	4	2	2	5	5	5	5	5	5
¿DÓNDE ESTÁ?	5	4	5	5	4	4	5	4	5	5	5	5	5	4	5	4	4	5
APLICACIÓN PARA MEJORAR LA VELOCIDAD LECTORA	5	5	4	5	5	5	5	5	5	4	4	4	5	5	5	5	5	5
APRENDER BRAILLE	3	3	2	3	2	4	4	3	4	4	4	3	4	4	4	5	5	5
APRENDIZAJE DE LA LECTOESCRITURA	4	4	5	5	5	4	5	5	4	3	3	4	4	4	4	4	5	5
APRENDO A ARRASTRAR	5	4	5	5	4	4	5	4	5	5	5	5	5	4	5	4	4	5
APRENDO A TOCAR LA PANTALLA 1	4	4	2	5	5	5	5	5	5	5	5	5	2	2	2	2	2	4
ARASAAC CREADOR DE ANIMACIONES	3	4	5	3	3	4	4	4	4	4	3	4	4	5	4	5	4	5
ARASAAC CREADOR DE PICTOGRAMAS	4	5	5	3	5	4	4	5	4	5	4	4	4	5	4	5	4	5
ARASAAC PICTOGRAMAS	4	5	5	3	5	4	4	5	4	5	4	4	4	5	4	5	4	5
AREAS Y PERÍMETROS	2	2	2	2	2	2	5	1	1	2	4	4	5	5	5	5	5	4
BOMBILLAS	5	5	3	5	4	4	5	4	4	4	5	5	5	5	5	5	5	5
CAUSA - EFECTO BOUNCY BALLS	4	4	2	4	4	5	5	5	3	4	4	3	3	3	3	3	3	5
CAUSA - EFECTO JUEGOS INFANTILES EL MAGO BORIS!	5	4	3	3	4	3	5	4	3	4	5	5	5	4	5	5	4	5
CAUSA - EFECCTO JUEGOS PARA BEBES Y NIÑOS: TREN DE COLORES	5	4	3	2	5	3	5	3	3	4	4	4	4	4	4	4	4	5
CAUSA - EFECTO JUEGOS INFANTILES GALLINAS Y POLLITOS	5	4	3	3	4	3	5	4	3	4	5	5	5	4	5	5	4	5
CAUSA - EFECCTO JUEGOS PARA BEBES Y NIÑOS: ESTRELLAS VIAJERAS	5	4	3	2	5	3	5	3	3	4	4	4	4	4	4	4	4	5
CAUSA - EFECTO JUEGOS DE SONIDOS DE ANIMALES SALVAJES	5	5	3	5	5	4	5	5	4	4	4	4	4	5	5	5	5	5
CAUSA - EFECTO JUEGOS PARA BEBES Y NIÑOS: LOS BUHOS MIRONES	5	4	3	2	5	3	5	3	3	4	4	4	4	4	4	4	4	5
CAUSA - EFECTO JUEGOS PARA BEBES Y NIÑOS: SOMBREROS MÁGICOS	5	4	3	3	4	3	5	4	3	4	5	5	5	4	5	5	4	5
CAUSA - EFECTO JUEGOS PARA BEBES Y NIÑOS: JUEGOS DE ANIMALES DE GRANJA	5	5	3	3	5	4	5	5	5	4	5	5	4	4	4	4	4	5
CAUSA - EFECTO JUEGOS PARA BEBES Y NIÑOS: SOMBREROS MÁGICOS	5	4	3	3	4	3	5	4	3	4	5	5	5	4	5	5	4	5
CAUSA - EFECTO JUEGOS PARA BEBES Y NIÑOS: PRIMAVERA	5	4	3	2	5	3	5	3	3	4	4	4	4	4	4	4	4	5
APRENDE NUMEROS JUEGO DIDACTICO PARA BEBES NINAS Y NIÑOS	5	5	4	4	5	4	5	4	4	4	4	5	4	5	5	5	5	5
JUEGOS GRATIS PARA BEBES, NIÑAS Y NIÑOS: LOS PAJARITOS CANTAN	5	4	3	2	5	3	5	3	3	4	4	4	4	4	4	4	4	5
JUEGOS ONLINE PARA NIÑOS PEQUEÑOS ARCOIRIS	5	5	4	5	4	5	4	4	4	4	4	5	4	5	5	5	5	5
CAUSA - EFECTO JUEGOS PARA BEBES Y NIÑOS: AVIONES	5	5	3	2	5	5	5	4	5	4	5	4	4	4	4	4	4	5
JUEGOS ONLINE PARA BEBES Y NIÑOS: ROBOT!	4	4	4	5	4	4	4	5	5	4	4	5	5	5	5	5	5	5
JUEGOS ONLINE PARA NIÑOS DE 1,2 Y 3 AÑOS	5	4	3	2	5	3	5	3	3	4	4	4	4	4	4	4	4	5
JUEGO DE ANIMALES DE GRANJA - JUEGOS GRATIS PARA BEBES Y NIÑOS PEQUEÑOS	5	5	4	5	4	5	4	4	4	4	4	5	4	5	5	5	5	5
CAUSA - EFECTO PRIORYWOODS	5	5	5	4	5	4	4	5	4	5	4	4	4	5	5	5	5	5
FIREWORKS	4	4	3	5	5	5	5	5	5	5	4	4	4	4	4	4	4	5
CAR CRUSHER	4	4	4	4	5	5	5	5	5	5	4	4	4	4	4	4	4	5
BALLOON BANG	4	4	4	5	5	5	5	5	5	5	4	4	4	4	4	4	4	5
BLAST THE PIRATE SHIP	4	4	4	5	5	4	5	5	5	5	4	4	4	4	4	4	4	5
FLY SWATTER	4	4	4	5	5	5	5	5	5	5	4	4	4	4	4	4	4	5
CRAZY CHICKEN	4	4	4	5	5	5	5	4	5	5	4	4	4	4	4	4	4	5
PRESS TO MOVE	4	4	4	5	4	5	5	5	5	5	4	4	4	4	4	4	4	5
PRESS TO REVEAL - CHRISTMAS	4	4	4	5	5	4	5	5	5	5	4	4	4	4	4	4	4	5
MOUSE FOLLOWER	4	4	4	4	5	5	5	5	4	5	4	4	4	4	4	4	4	5
CHRISTMAS SINGING SHEEP	4	4	4	5	5	4	5	5	4	5	4	4	4	4	4	4	4	5
PRESS TO ZOOM - BRIGHT SHAPES	4	4	4	5	5	5	4	5	5	5	4	4	4	4	4	4	4	5
MOVE TO MOUSE	4	4	4	5	5	4	5	5	5	5	4	4	4	4	4	4	4	5
PRESS TO ZOOM - THINGS THAT FLY	4	4	4	5	5	4	5	5	4	5	4	4	4	4	4	4	4	5
CIFRAS	5	5	4	4	4	5	5	5	5	4	5	5	5	5	5	5	5	5
COLLAGE	4	3	4	5	5	4	4	4	4	5	4	4	4	4	4	4	4	5
CÓMO SE LEEN LOS NÚMEROS DECIMALES	4	5	5	4	5	4	3	4	4	4	4	4	5	5	5	5	5	5
COMPRENSIÓN VERBAL ELG	4	4	3	4	5	4	5	5	5	5	5	5	4	4	4	4	4	5
CONECTO CON LAS MATES	5	5	3	4	5	5	4	4	4	4	4	4	5	5	5	5	5	5
CONSTRUCTOR DE ÁREAS	5	5	4	5	5	4	5	5	4	4	5	5	5	5	5	4	4	5
CURSO DE MECANOGRAFÍA VEDOQUE	5	5	4	4	5	4	5	4	5	5	4	4	5	5	5	5	5	5
DICCISEÑAS	5	5	5	5	5	5	5	5	5	5	5	5	5	5	5	5	5	5
DISORTOGRAFÍA	4	4	5	4	5	5	5	5	4	4	4	4	5	4	4	4	5	4
EL JARDIN DE LOS SENDEROS QUE SE BIFURCAN	5	5	3	4	4	3	4	4	3	4	4	4	4	4	4	3	4	5
EL PUNTO SOBRE LA I	4	5	3	4	5	4	4	4	4	3	4	4	4	5	5	5	5	5
EL TANQUE MATEMÁTICO	3	4	3	4	4	3	4	3	3	3	4	2	3	3	4	3	3	4
EL TEATRO	4	4	3	5	4	4	5	5	5	4	5	5	5	5	5	5	5	4
EL TOQUE MÁGICO	5	5	4	5	5	5	5	5	5	5	5	5	5	5	5	5	5	5
EL USO DE LA MAYÚSCULA	4	4	2	3	4	3	4	4	4	3	4	3	4	4	4	4	4	4
ENERGÍA EN LA PISTA DE PATINAR	4	5	5	4	5	5	5	5	4	5	5	5	4	5	5	5	5	5
FÍODOR	5	5	3	5	4	5	5	5	5	4	4	5	5	5	5	5	5	5
FONDO LECTOR	4	4	4	4	4	3	4	3	4	2	3	3	4	4	4	4	3	4
FONEMA /R/ MÚLTIPLE: INTEGRAMOS EN PALABRAS	4	4	4	4	5	4	5	3	5	4	5	5	4	4	3	4	5	5
HISTORIAS DEL CIELO. LA ASTRONOMÍA A TRAVÉS DE LOS MITOS	5	5	3	4	5	4	4	4	5	5	5	4	4	4	5	5	5	5
JUEGOS MUSICALES (MUSICAEDUCA)	5	5	4	5	5	4	5	4	4	4	4	4	5	5	5	5	5	5
LA OCA	5	5	3	4	5	4	4	4	5	5	5	4	4	4	5	5	5	5
LAS FAMILIAS INSTRUMENTALES	5	5	5	5	5	4	5	5	4	4	4	4	4	4	4	5	5	4
LAS HERRAMIENTAS	4	4	3	4	4	4	4	4	4	4	3	4	4	5	4	4	4	5
LAS HORAS DEL RELOJ	5	5	4	4	4	4	5	5	4	4	3	4	4	4	4	5	5	4
LAS LETRAS	4	5	4	5	5	4	5	5	4	4	5	5	5	5	5	5	5	5
LAS LETRAS QUE SUENAN	5	5	4	4	4	4	5	5	4	4	3	4	4	4	4	5	5	4
LAS PALABRAS	5	4	3	4	5	4	5	5	4	4	4	4	4	5	4	5	5	5
LAS TABLAS DE MULTIPLICAR	4	4	3	5	5	4	5	5	4	5	5	5	4	5	5	5	5	5
LAS VOCALES	5	4	3	4	5	4	5	5	4	4	3	3	3	4	3	3	4	4
LAS VOCALES CLIC	4	5	3	4	4	4	5	4	4	4	4	4	4	5	4	5	4	5
LATERALIDAD Y RELACIONES ESPACIALES	4	4	3	3	4	4	5	4	5	4	3	4	3	4	4	4	4	4
LECTOESCRITURA ADAPTADA	4	4	3	3	4	4	2	3	4	4	5	4	3	4	4	3	3	5
LECTURAS CORTAS Y RÁPIDAS NIVEL AVANZADO DE MUNDO PRIMARIA	4	4	3	3	4	3	5	4	3	4	4	4	3	4	4	4	4	4
LECTURAS CORTAS Y RÁPIDAS NIVEL BÁSICO DE MUNDO PRIMARIA	4	4	3	3	4	4	5	4	4	5	5	5	5	5	5	5	5	5
LECTURAS CORTAS Y RÁPIDAS NIVEL MEDIO DE MUNDO PRIMARIA	4	4	3	3	4	3	5	4	3	4	4	4	3	4	4	4	4	4
LEO, LEO	4	4	4	5	5	4	5	4	4	4	4	4	5	5	5	5	5	5
LETRA INICIAL MAYÚSCULA	4	4	2	3	4	3	4	4	4	3	4	3	4	4	4	4	4	4
MONCHITO PUEDE HACERLO SOLO	5	5	5	5	5	5	5	5	5	5	5	5	5	5	5	5	5	5
MONOJO Y HEXAMANO. VEDOQUE 1	4	3	3	4	4	3	4	5	4	3	5	4	4	5	4	4	4	5
MOUSE FOLLOWER	5	5	3	3	4	4	4	4	4	4	5	4	4	4	4	4	4	5
MUEVE LA MANO	5	5	4	4	4	3	4	4	4	3	4	4	4	4	4	3	3	4
MULTIPLEITOR	4	5	3	4	5	3	4	4	3	4	5	5	4	5	5	5	5	5
ORTOGRAFÍA ESPACIAL	5	5	3	5	5	4	5	4	4	4	4	4	4	5	5	5	5	4
ORTOGRAFIATE	5	5	5	5	5	4	5	5	4	5	5	5	5	5	5	5	5	5
PEQUETIC	5	5	4	4	4	4	5	5	4	4	5	4	4	4	5	5	5	5
PICTOAGENDA	5	5	5	5	5	5	5	4	5	4	4	5	5	5	5	5	5	5
PICTOCUENTOS	5	5	4	5	5	4	5	4	5	4	5	4	5	5	5	5	5	5
PICTOJUEGOS PEGATINAS	5	5	5	5	5	5	5	5	4	5	5	5	5	5	5	5	5	5
PICTOJUEGOS CABEZUDOS	5	5	5	5	5	5	5	5	4	5	5	5	5	5	5	5	5	5
PICTOJUEGOS BÁSICOS	4	4	3	5	5	3	4	4	3	4	5	4	5	5	5	5	5	5
PICTOJUEGOS PICTOMEMORY	5	5	5	5	5	5	5	5	5	5	5	5	5	5	5	5	5	5
PICTOJUEGOS EMOCIONES	5	5	5	5	5	5	5	5	4	5	5	5	5	5	5	5	5	5
PICTOJUEGOS ACCIONES	5	5	5	5	5	5	5	5	5	5	5	5	5	5	5	5	5	5
PICTOJUEGOS PUZZLE	5	5	5	5	5	5	5	5	5	5	5	5	5	5	5	5	5	5
PICTOSONIDOS	5	5	5	5	5	5	5	5	5	5	5	5	5	5	5	5	5	5
PICTOTRADUCTOR	5	5	5	5	5	5	5	5	5	5	5	5	5	5	5	5	5	5
PROBLEMÁTICAS	4	4	4	4	4	3	4	4	4	3	3	3	4	3	5	5	5	5
PUNTOS	4	4	3	3	4	4	5	5	4	4	4	4	4	5	5	4	4	5
REGLAS DE ORTOGRAFIA	4	4	3	4	4	4	5	5	4	3	4	5	4	4	4	4	4	4
ROMPECABEZAS PARA NIÑOS	5	5	3	4	5	5	5	5	4	4	5	5	5	5	5	5	5	5
SCIENCE WRITER	4	4	5	4	4	4	4	5	4	4	4	5	5	5	4	4	4	5
SERIES MATEMÁTICAS	3	4	3	3	4	4	3	3	3	3	3	3	4	4	4	4	4	5
SÍLABAS	4	4	3	4	4	4	5	5	4	4	3	4	4	4	4	3	4	4
SOPAS DE LETRAS	5	4	3	3	4	5	4	4	3	4	4	3	4	4	5	5	5	5
SPEED TYPING ONLINE	5	5	5	5	5	4	5	5	4	5	5	5	5	5	5	5	5	5
SUMAMONEDAS	5	5	4	5	5	4	5	5	5	5	5	5	5	5	5	5	5	5
TÉCNICAS DE ESTUDIO	4	4	3	4	4	3	5	4	3	4	3	4	4	4	4	4	4	5
TIPOS DE ALIMENTOS	4	4	3	4	4	4	4	3	3	4	4	4	4	4	5	5	5	5
TRIGONOMETRÍA	4	4	3	4	4	4	5	4	3	3	4	4	4	5	4	4	3	4
TÚ Y TU DINERO	3	4	3	3	4	4	3	4	4	4	5	4	4	4	5	5	5	5
VELILA AL MANDO DE LA MATENAVE	5	5	4	4	4	4	5	5	4	4	4	4	4	5	5	5	5	5
VERBOS VOZ PASIVA	3	3	3	2	3	4	3	4	3	3	3	3	3	3	3	3	3	5
ACTIVIDADES DE COMPRENSIÓN LECTORA	4	4	3	4	4	3	5	4	3	4	3	4	4	4	4	4	4	5
ACTIVIDADES DE LECTOESCRITURA	3	4	3	3	4	2	4	4	3	3	4	4	4	4	4	4	4	5
APRENDIENDO A SUMAR Y RESTAR	4	4	3	3	4	3	4	4	4	3	3	4	4	5	4	4	4	5
ARITMÉTICA	4	5	5	5	5	5	5	4	4	5	4	4	5	5	5	5	5	5
CAMBIO DE EXPRESIONES	5	5	5	5	5	4	4	5	5	4	4	4	5	5	5	5	5	5
CAMBIOS Y FORMAS DE ENERGÍA	5	5	5	5	5	5	4	4	4	4	5	5	5	5	5	5	5	5
CONCENTRACIÓN	5	5	5	5	5	5	5	4	4	4	5	5	5	5	5	5	5	5
CONSTRUYE UN ÁTOMO	5	5	5	5	5	5	4	4	4	4	5	5	5	5	5	5	5	5
CUENTOS PARA LA TOLERANCIA	3	3	3	4	4	3	4	3	3	3	4	4	4	4	3	3	3	4
DE VIAJE POR EL SISTEMA SOLAR	5	4	3	4	4	3	4	4	4	4	5	4	4	4	4	4	4	4
DECIMALES 2º CICLO	4	4	5	4	4	4	4	4	3	4	4	4	4	4	4	4	4	4
DENSIDAD	5	5	5	5	5	5	5	5	5	4	4	4	4	4	4	4	5	5
EL BUS AZUL	4	5	4	4	5	3	5	4	3	4	4	4	4	4	4	4	4	4
EL NIÑO QUE TENÍA MAL CARÁCTER	4	4	4	4	4	3	4	4	4	4	4	4	4	4	4	4	4	4
ESCALA DE pH	4	5	5	5	5	5	4	4	4	4	5	5	5	5	5	5	5	5
ESCALA pH: BÁSICOS	5	5	5	5	5	5	5	5	5	4	4	4	4	4	4	4	5	5
ESTADOS DE LA MATERIA: FUNDAMENTOS	4	4	5	4	5	5	5	4	5	5	5	5	5	5	5	5	5	5
EXPLORADOR DE IGUALDADES	5	4	4	4	4	4	5	5	4	4	5	4	4	4	5	5	5	5
FIGURAS	4	4	3	4	4	3	4	3	3	4	4	3	4	4	4	4	4	4
FLOTABILIDAD	5	5	4	5	4	5	5	5	5	4	5	5	5	5	5	5	5	5
FRACCIONES NÚMEROS MIXTOS	4	5	5	5	5	5	5	5	5	5	5	5	5	5	5	5	5	5
FUERZAS Y MOVIMIENTOS: FUNDAMENTOS	5	4	5	4	4	4	5	5	5	4	5	5	5	5	5	5	5	5
GENERADOR DE FUNCIONES	4	5	5	5	5	5	4	5	4	5	5	5	5	5	5	5	5	5
GRAFICANDO RECTAS	5	5	4	5	4	5	5	5	5	4	5	5	5	5	5	5	5	5
GUSILETRA	4	4	3	4	4	3	4	4	4	4	4	4	4	4	5	5	5	5
HABILIDADES DE LECTURA Y ESCRITURA	4	5	3	4	4	3	4	4	3	4	4	3	4	4	4	4	4	4
HAZ UN DIEZ	4	4	4	4	4	3	4	4	4	4	3	4	4	4	4	4	4	4
JACK Y LA HABICHUELA MÁGICA	4	4	3	4	4	3	5	4	3	4	5	4	4	4	4	4	4	4
JUEGOLEC	4	3	3	4	4	4	4	4	4	4	3	3	4	4	4	4	4	5
LA CASA QUE PEDRO VA A HACER	5	5	3	5	5	3	5	4	4	4	5	4	4	5	4	4	4	5
LA GRANJA	4	4	3	4	4	3	4	4	4	4	3	4	4	5	5	5	5	5
LA NARANJA	3	4	3	4	4	3	5	4	3	4	5	4	4	4	4	4	4	4
LABORATORIO DE FUERZA DE GRAVEDAD	5	5	5	5	5	5	5	5	4	4	5	4	4	5	4	4	5	5
LEY DE EQUILIBRIO	4	5	5	5	5	5	5	5	5	4	5	5	5	5	5	5	5	5
LEY DE HOOKE	5	5	5	5	5	5	5	5	4	4	5	4	4	5	4	4	5	5
LEY DE OHM	3	4	4	4	5	5	5	4	4	4	5	4	4	4	4	4	4	5
LOS VERBOS-2	4	5	3	4	4	4	5	5	4	4	3	4	4	4	5	5	5	5
MATEMÁTICAS 1º DE PRIMARIA	3	4	3	4	4	3	4	4	3	4	4	4	4	4	4	4	4	4
MI SISTEMA SOLAR	5	5	5	5	5	5	5	5	4	4	5	4	4	5	4	4	5	5
MODELO DE ÁREAS: ÁLGEBRA	4	5	5	5	5	4	5	4	5	5	5	5	5	5	5	5	5	5
MODELO DE ÁREAS: DECIMALES	4	5	5	5	5	4	5	5	4	4	4	5	4	4	5	4	5	5
MODELO DE ÁREAS: INTRODUCCIÓN	4	5	5	5	5	4	5	4	5	5	5	5	5	5	5	5	5	5
MODELO DE ÁREAS: MULTIPLICACIÓN	4	5	5	5	5	4	5	5	4	4	4	4	5	4	5	4	5	5
ONDA EN UNA CUERDA	4	5	5	5	5	5	5	4	5	5	5	5	5	5	5	5	5	5
PAREJAS DE FRACCIONES	4	5	5	5	5	4	5	5	4	4	5	4	5	4	5	4	5	5
PISTA DE JUEGO DE PROPORCIONES	4	4	4	4	5	5	5	4	4	5	5	5	5	5	5	5	5	5
PROBABILIDAD PLINKO	4	4	5	4	4	4	5	5	5	4	5	5	5	5	5	5	5	5
PROBLE+	5	5	4	5	5	4	4	4	3	4	5	4	5	5	5	5	5	5
PROPORCIONALIDAD	4	4	3	4	4	3	4	4	3	4	3	4	4	5	4	4	4	4
RAZÓN UNITARIA	4	5	5	5	5	5	5	4	5	5	5	4	5	5	5	5	5	5
DESCOMPOSITEITOR	5	4	3	3	3	3	4	4	4	4	4	4	4	4	5	4	4	5
ECUACIONES DE SEGUNDO GRADO	4	5	4	5	5	4	4	4	4	4	4	4	4	4	4	4	4	5
CONSTRUYE UNA FRACCIÓN	4	4	5	5	5	5	5	4	5	5	5	5	5	5	5	5	5	5
RESISTENCIA EN UN ALAMBRE	5	5	3	4	4	4	5	5	4	4	5	4	5	5	5	5	5	5
SOLUCIONES ÁCIDO-BASE	3	4	5	5	5	5	4	5	4	4	5	5	5	5	4	4	5	5
REFLEXIÓN Y REFRACCIÓN	5	5	4	4	4	4	5	5	4	4	5	4	4	5	4	4	4	5
DICCIONARIO WORDREFERENCE	4	5	4	4	5	4	5	5	4	4	5	5	5	5	5	5	5	5
GEOGEBRA	5	5	5	5	4	4	4	5	4	4	5	4	4	5	5	4	5	5
DICCIONARIO RAE	4	3	4	4	4	4	5	5	4	4	4	4	4	5	5	5	5	5
DUOLINGO	5	5	5	5	5	4	5	5	5	5	5	5	5	5	5	5	5	5
¿DÓNDE VA?	4	4	3	4	5	4	5	5	4	4	3	4	4	5	4	4	4	5
MATEMÁTICAS PARA JUGAR	5	4	3	4	4	4	5	5	4	4	3	4	4	5	4	4	5	5
ESTIMACIÓN	3	4	4	4	5	5	4	4	4	4	4	4	4	5	5	5	5	5
MOLARIDAD	4	4	4	4	5	4	5	5	4	4	5	4	4	5	4	4	4	5
REACTIVOS, PRODUCTOS Y EXCEDENTES	4	5	5	5	5	5	4	4	4	4	4	4	5	5	5	5	5	5
VISIÓN DEL COLOR	4	4	4	4	5	4	5	5	4	4	5	4	4	5	5	5	5	5
LOS VERBOS-1	3	4	3	4	5	3	4	4	3	4	4	4	4	5	4	4	5	5
TANGENCIAS	3	3	3	3	4	4	3	3	4	4	3	4	5	5	5	5	5	5
MUSESCORE	5	4	4	4	5	4	5	5	4	4	5	5	5	5	5	5	5	4
SOYVISUAL LECTOESCRITURA / #Soyvisual	5	5	3	3	5	5	5	5	5	5	3	3	5	5	5	3	4	3
SOYVISUAL RAZONAMIENTO LÓGICO	5	5	5	5	5	5	5	5	5	5	5	5	5	5	5	5	5	5
SOYVISUAL APP	5	5	3	3	5	5	5	5	5	5	3	3	5	5	5	3	4	3
SOYVISUAL GRAMÁTICA - MORFOSINTAXIS	5	5	3	3	5	5	5	5	5	5	3	3	5	5	5	3	4	3
SOYVISUAL LÉXICO - SEMÁNTICA	5	5	3	3	5	5	5	5	5	5	3	3	5	5	5	3	4	3
TRADUCTOR DE GOOGLE	4	4	3	4	5	4	5	5	4	4	4	4	4	5	5	5	5	4
HÁBLALO	4	4	4	4	5	5	5	5	4	4	5	4	5	5	5	5	5	4
KITSORD - LENGUAJE DE SEÑAS	4	4	4	4	5	5	5	5	4	4	5	5	5	4	5	5	4	4
OTTAA	5	5	4	4	5	5	5	4	4	4	5	4	4	4	4	4	4	4
OTSIMO	5	5	4	4	4	4	4	4	4	4	5	5	5	4	5	4	5	4
MERCK PTE	5	5	5	5	5	5	5	5	5	5	5	5	5	5	5	5	5	4
¿ESO DÓNDE ESTÁ?	5	4	4	4	4	5	5	5	4	4	5	5	5	5	5	5	5	5
SCRATCH	4	4	4	4	4	4	3	4	4	4	5	4	4	4	5	5	5	4
OFFICE LENS	5	4	5	4	5	5	5	4	4	4	5	5	5	4	5	5	5	5
ONENOTE	5	4	5	4	5	5	5	4	4	4	5	5	5	4	5	5	5	5
WHAT´S MY PAIR 2 / TODDLER PUZZLE GAMES POR KIDS	5	4	5	4	5	5	5	5	5	5	5	5	5	5	5	5	5	4
ASISTENTE DE VOZ GOOGLE	5	5	5	4	4	5	5	5	5	4	5	4	4	5	4	4	4	5
SÍGUEME	5	5	5	5	5	5	5	5	5	5	5	5	5	5	5	5	5	5
ACCESSIBILITY PLUS	4	3	3	4	5	5	5	5	4	4	5	4	3	4	3	3	4	4
TICO4ANDROID	3	4	4	4	5	4	4	4	4	4	4	4	4	3	4	4	4	4
MÍNIMO	5	4	4	5	5	5	5	5	4	4	5	4	4	4	4	4	4	4
AKINATOR	5	5	5	5	4	4	5	5	4	4	5	4	4	5	4	4	4	4
PACÍFICA (actualmente llamada SANVELLO)	4	4	4	4	4	4	4	5	4	4	5	5	4	4	5	5	5	4
BUILD IT UP	5	5	3	4	4	4	5	5	4	4	5	4	4	4	4	4	4	4
AZAHAR	4	4	5	4	5	4	5	4	4	4	4	4	4	5	4	4	4	4
BABY ADIVINO	4	4	5	4	4	4	5	5	4	4	4	4	4	5	4	4	4	4
LÉELO FÁCIL EDUCACIÓN	4	4	3	4	4	4	4	3	3	3	4	4	4	4	4	4	5	4
AMANZIVISION	5	4	4	5	4	4	4	3	4	4	3	4	4	4	4	4	4	4
DYTECTIVEU	5	5	5	5	5	5	5	5	4	4	4	4	4	5	4	4	4	4
DILO EN SEÑAS	5	5	5	5	5	5	5	5	5	5	5	5	5	5	5	5	5	4
3 D PUZZLE BLOCKS	5	5	4	5	5	5	5	5	5	5	4	4	4	5	4	4	5	4
ACCESIBLE MEMORY	5	4	5	5	5	5	5	5	4	4	5	4	4	5	4	4	4	4
ANDROIDPLAPHOONS	5	4	4	4	5	4	5	5	5	4	4	4	4	5	5	5	5	4
APRENDE GEOGRAFÍA	5	4	4	4	4	4	5	5	4	4	5	4	4	4	4	4	4	4
ASL LENGUAJE DE SIGNOS AMERICANO	5	5	5	5	5	5	5	5	5	4	5	4	4	4	4	4	4	4
BABY TOY WITH LOCK	5	5	5	5	5	5	5	5	5	5	5	5	4	5	5	5	5	4
BEBÉ JUEGOS DE INTELIGENCIA	5	5	4	4	4	5	5	5	5	4	4	4	4	5	5	5	5	4
BLIND SIMONE	5	4	4	5	5	4	5	5	4	4	3	4	3	4	4	4	4	4
BRAILLIAC	5	4	5	4	4	4	5	5	4	4	5	4	4	5	4	5	4	4
CALCULADORA VOICE	4	3	4	4	4	3	4	4	3	3	4	4	4	5	4	5	4	4
COLORES PARA NIÑOS	4	4	4	3	3	3	4	4	3	3	4	3	3	3	3	3	4	4
COMUNICANT	5	4	5	4	5	4	5	5	4	4	4	4	4	4	5	4	4	4
CPA	4	4	3	3	3	2	2	4	3	3	3	3	3	2	2	2	3	3
DESAFÍOS MÁS Y MENOS	5	4	4	5	5	4	5	5	4	3	4	4	4	4	4	4	4	4
DICTAPICTO	4	4	5	4	4	4	4	5	4	3	4	4	4	5	4	5	4	4
DRUM SET	4	4	4	4	5	4	5	5	4	4	5	4	4	4	4	5	4	4
EJERCICIOS DE SINTAXIS	4	5	4	4	5	4	4	4	4	4	3	3	4	5	5	5	5	4
HABLA FÁCIL AUTISMO DIEGODICE	4	4	3	4	4	4	4	4	3	3	4	4	4	4	4	4	4	4
JUEGO DE PINTURA Y DIBUJO	5	4	5	4	4	4	5	4	5	4	5	4	4	5	5	5	5	4
JUEGOS EDUCATIVOS PARA NIÑOS	5	5	4	5	5	5	5	5	5	5	5	4	4	5	4	5	4	4
JUMPY CAR ADHD	5	5	4	4	5	5	5	5	5	5	4	4	5	5	5	4	4	4
MESSAGETTS	4	3	4	4	4	4	5	5	5	5	4	4	5	5	5	5	5	4
MYGAME MEMORY	4	4	5	4	5	5	5	5	4	4	4	4	4	5	4	4	5	4
MYGAME PUZZLE	4	4	5	4	5	5	5	5	4	4	4	4	4	5	4	4	5	4
MYGAME SEQUENCES	4	5	5	5	5	4	5	5	5	4	5	4	4	4	5	5	5	4
MYGAME WORDSEARCH	4	4	5	4	5	5	5	5	5	4	5	5	5	5	5	5	5	4
NORMAS PARA NIÑOS	5	4	5	5	5	5	5	5	5	4	4	4	5	5	5	5	5	4
OÍDO PERFECTO	4	5	4	4	4	4	5	5	5	4	5	4	4	5	4	4	4	4
ORTOGRAFÍA	3	4	4	4	5	4	5	5	4	4	3	4	4	5	3	4	4	4
PICTO ONE	4	4	5	4	4	4	5	5	4	4	5	4	4	4	4	4	4	4
PICTOCAM	5	4	5	4	5	4	5	5	4	5	5	4	4	5	5	5	5	4
PICTODROID HEAD LITE	5	4	5	4	5	5	5	5	4	4	5	4	4	5	5	5	5	4
PICTODROID LITE	5	4	5	4	5	5	5	5	4	4	5	4	4	5	5	5	5	4
PICTODROID MED	5	4	5	4	5	5	5	5	4	4	5	4	4	5	5	5	5	4
PICTOGRAMAGENDA	4	4	5	4	5	4	4	4	4	4	3	3	4	4	3	3	3	4
REALCAL SCIENTIFIC CALCULATOR	4	4	3	4	3	4	5	5	4	4	4	4	4	4	4	3	3	4
SECUENCIA	5	5	4	5	5	5	5	5	5	4	5	4	4	4	4	4	4	4
SETTIME	4	4	5	5	5	4	5	5	5	4	4	4	4	5	4	4	4	4
SUPERAPP	5	4	5	4	4	5	5	5	4	4	5	4	4	5	5	5	5	4
TABLA PERIÓDICA	3	4	3	3	4	4	5	5	4	4	5	4	4	4	3	3	3	4
TABLAS DE MULTIPLICAR	4	4	4	4	4	4	5	5	4	4	3	4	4	5	5	5	4	4
TEAYUDO A JUGAR	4	4	5	4	4	4	5	5	4	4	5	4	4	5	4	4	4	4
TECUENTO	4	5	5	5	5	5	4	5	4	4	4	4	4	5	4	4	4	4
TEMPUS	4	4	4	4	4	4	5	5	4	4	5	4	4	5	4	4	4	4
CIRKUITS	5	5	4	5	4	4	5	5	4	4	5	5	5	5	4	4	4	4
JABTALK	4	4	5	4	4	4	4	4	4	4	4	4	4	5	4	4	3	4
MYKEYBODROID	4	4	4	4	4	4	3	3	4	4	4	3	3	4	3	3	3	4
GEOMETRY PAD	5	5	5	5	5	5	5	5	4	4	5	4	5	5	4	5	4	4
CAUSA - EFECTO EL BUHO BOO	5	4	4	4	5	5	5	5	4	4	5	4	4	5	4	4	4	4
DICCIONARIO WORDREFERENCE	4	5	4	4	4	4	5	4	4	4	5	4	4	4	5	5	4	4
B-RESOL	4	5	4	4	4	4	5	5	4	4	5	4	4	4	4	4	4	4
APRENDE LAS HORAS	4	4	4	4	5	4	5	5	4	4	5	4	4	5	5	5	4	4
FLOW FREE	5	5	4	5	5	4	5	5	4	4	5	4	4	4	5	5	4	4
LETMETALK	4	5	5	4	5	5	5	5	5	4	5	4	5	5	4	4	4	4
LAZZUS	5	5	5	4	4	4	5	5	4	4	4	4	4	5	5	5	5	4
IFUNFACE	4	4	4	4	4	4	3	3	4	3	3	4	4	3	3	3	3	4
LETRAS MÁGICAS	5	5	3	4	5	5	5	5	5	5	5	5	5	5	5	4	5	5
MEMO FLASH	4	4	4	4	4	3	3	3	3	4	4	4	3	3	3	3	3	4
PUZZLES DE VEHÍCULOS	4	4	3	3	4	4	5	5	4	3	5	4	3	4	4	4	4	4
SUSTANCIAS QUÍMICAS	5	5	4	4	5	5	5	5	4	4	5	5	5	5	5	4	4	4
TAP MATH	5	5	4	4	4	4	5	5	4	4	4	4	4	4	5	4	4	4
ABC PRESCHOOL	4	4	4	4	4	4	5	5	4	4	5	4	4	4	4	4	4	4
BUILD A TRUCK	5	5	5	4	4	4	5	5	4	4	5	4	4	5	5	5	5	4
COMUNICADOR TÁCTIL ONCE	4	5	5	4	5	5	5	5	5	5	4	4	5	5	5	5	5	4
FISH SCHOOL	5	5	4	5	5	4	5	5	4	4	5	4	5	5	4	4	4	4
PEPI BATH LITE	4	3	3	3	4	4	4	5	3	3	4	3	4	5	3	4	4	4
PET BINGO	5	5	5	5	4	4	5	5	4	4	5	4	4	4	5	4	4	4
WHEELS ON THE BUS	3	4	3	4	4	4	5	5	4	4	4	4	4	5	4	4	4	4
CARDIÓGRAFO	5	5	5	5	5	5	5	5	4	4	5	5	5	5	5	5	5	4
FOREST MANTENTE ENFOCADO	4	4	5	4	4	4	5	5	4	4	5	4	4	5	5	5	5	4
PATCHIMALS - FORMAS Y COLORES	5	5	4	4	4	4	5	5	5	4	5	4	4	4	5	4	4	4
PHOTOMATH	5	5	4	5	5	5	5	5	5	5	5	4	4	5	5	4	4	4
BRAIN PUZZLE PRO	5	5	4	4	4	4	5	5	4	4	5	4	4	5	4	4	4	4
CAILLOU - JUEGOS EDUCATIVOS / APRENDE CON CAILLOU	5	5	4	4	5	5	5	5	4	4	5	4	4	5	4	4	4	4
ESCAPE LOGAN ESTATE	5	4	4	5	5	5	4	4	4	4	5	4	4	5	4	4	4	4
ROSCORAE	5	5	5	3	5	5	5	5	5	5	3	3	5	5	5	4	5	5
SPATIAL LINE PUZZLES	4	4	4	5	5	5	5	5	4	4	5	5	5	5	4	4	4	4
YHOMEWORK - MATH SOLVER	5	5	5	4	5	4	5	5	4	4	4	5	5	5	4	3	4	4
LEO CON GRIN / APRENDER A LEER 1 CON GRIN	5	5	5	4	4	4	5	5	4	4	5	5	5	5	4	4	4	4
PICTO TALK	5	4	4	4	4	4	5	5	4	4	5	4	4	5	4	4	3	4
SALVA MIS JUGUETES	5	5	4	4	4	4	5	5	4	4	5	5	5	5	4	4	4	4
SIMON DICE	5	5	4	5	5	5	5	5	4	4	5	5	5	5	4	5	5	4
TRADUCTOR FRASES VIAJES	5	5	5	5	5	5	5	5	4	5	5	4	5	5	5	5	4	4
TANGRAM	5	5	4	5	5	4	5	5	4	4	5	5	5	5	4	5	4	4
MATEMÁTICAS CON GRIN 456	5	5	4	5	4	5	5	5	5	4	5	5	5	5	4	4	5	4
FANTASTIC 4 IN A ROW	5	5	5	4	5	5	5	5	4	4	5	5	4	5	5	5	4	4
GEOGEBRA	4	5	5	5	5	5	5	5	4	4	5	4	4	5	5	4	4	4
ARBOLAPP	5	5	4	4	4	5	5	5	5	5	5	4	4	5	3	3	3	4
DICCIONARIO RAE	5	4	4	4	4	4	5	5	4	4	4	5	5	5	5	4	5	5
DUOLINGO	5	4	4	5	5	5	5	5	5	5	5	5	5	5	5	5	5	5
JOSÉ APRENDE cuentos	4	4	4	4	5	4	5	5	4	4	5	4	4	4	4	4	4	4
OBJETOS ESCONDIDOS - MYSTERY SOCIETY	5	4	4	4	5	5	5	5	4	4	5	3	4	5	5	5	5	4
GCOMPRIS	5	5	3	3	5	3	5	4	4	4	3	3	4	4	3	3	4	5
CAUSA - EFECTO EL BUHO BOO	5	4	3	4	4	4	5	4	4	4	5	4	5	4	4	5	4	4
ARAWORD	4	4	3	1	3	3	3	3	3	4	3	3	3	3	3	3	3	4
MUSESCORE	4	4	3	1	4	4	4	5	4	5	3	3	5	4	4	4	5	4
TUX PAINT	5	5	3	4	5	5	5	5	5	5	3	3	5	5	5	4	4	5
SENSORY LIGHT BOX	5	5	3	2	5	5	5	5	5	5	4	4	5	5	4	5	5	5
IN-TIC	5	5	5	3	5	5	5	5	5	5	4	4	5	4	4	3	5	5
SCRATCH	5	5	3	1	4	4	4	5	5	3	3	3	4	4	4	4	4	4
OFFICE LENS	4	4	3	1	5	5	3	5	5	5	5	4	5	5	5	4	4	5
ARABOARD	4	3	3	1	3	3	3	3	3	3	3	3	4	4	3	3	3	5
ONENOTE	3	3	3	1	3	3	4	3	3	3	4	4	4	4	3	3	3	5
VILLAPLANET	5	5	3	1	5	5	5	5	5	5	3	3	5	5	5	5	5	4
NUMEROS DE COLORES	5	5	5	1	5	5	5	5	5	5	3	3	4	4	3	3	4	5
CAUSE AND EFECT SENSORY (LIGHT BOX)	5	5	3	2	5	5	5	5	5	5	4	4	5	5	4	5	5	5
AZAHAR	4	4	3	1	4	3	4	4	4	4	3	3	4	4	3	3	3	5
CMAP TOOLS	3	3	3	1	3	3	2	3	3	3	3	3	3	2	2	2	2	5
PICTOSELECTOR	4	3	2	2	3	3	2	2	3	3	3	3	3	3	3	3	2	4
ACTIVIDADES DE COMPRENSIÓN LECTORA	4	2	3	1	4	4	5	4	4	4	2	1	4	3	3	1	4	3
ACTIVIDADES DE LECTOESCRITURA	4	4	3	1	4	4	3	3	3	4	3	2	4	3	4	4	4	3
APRENDIENDO A SUMAR Y RESTAR	2	3	2	1	3	4	3	4	4	4	2	3	4	3	3	4	4	4
ARITMÉTICA	5	5	3	1	5	5	5	4	5	5	4	4	5	5	5	5	5	5
BALANCEO DE ECUACIONES QUÍMICAS	5	5	3	1	5	5	5	5	5	4	3	3	5	5	5	5	5	5
CAMBIO DE EXPRESIONES	2	3	2	1	2	4	1	4	4	4	4	4	3	2	4	1	3	5
CAMBIOS Y FORMAS DE ENERGÍA	3	4	1	1	4	4	4	4	4	4	3	3	4	3	2	2	4	5
CONCENTRACIÓN	4	4	3	1	4	4	3	4	4	5	3	3	4	4	4	3	3	5
CONSTRUYE UN ÁTOMO	4	4	1	1	5	4	4	5	4	4	3	3	4	4	4	4	4	5
CUENTOS PARA LA TOLERANCIA	3	3	3	1	4	4	4	4	4	4	3	3	4	4	3	3	4	3
DE VIAJE POR EL SISTEMA SOLAR	3	3	3	1	4	4	4	4	4	4	4	2	4	3	3	4	4	3
DECIMALES 2º CICLO	2	2	2	1	2	3	4	4	4	3	2	2	3	2	2	2	3	3
DENSIDAD	4	4	2	1	4	4	4	4	5	4	3	3	4	4	4	4	4	5
EL BUS AZUL	3	4	3	1	3	4	4	4	4	4	2	2	3	3	3	4	4	3
EL NIÑO QUE TENÍA MAL CARÁCTER	1	2	1	1	3	3	3	3	2	2	2	2	3	2	2	2	3	3
ESCALA DE pH	5	4	3	1	4	4	4	5	5	5	3	3	4	4	4	4	5	5
ESCALA pH: BÁSICOS	5	4	3	1	4	4	4	5	5	5	3	3	4	4	4	4	5	5
ESTADOS DE LA MATERIA: FUNDAMENTOS	5	5	2	1	5	4	4	4	5	5	3	5	5	5	5	4	4	5
EXPLORADOR DE IGUALDADES	5	5	3	1	5	5	5	5	5	3	3	4	5	5	5	5	5	5
FIGURAS	4	3	2	1	4	4	4	4	4	4	3	3	4	4	3	3	4	3
FLOTABILIDAD	5	5	2	1	5	5	5	5	5	5	3	4	5	5	3	4	5	5
FRACCIONES NÚMEROS MIXTOS	5	5	3	1	5	4	5	5	5	3	4	5	5	4	4	4	4	5
FUERZAS Y MOVIMIENTOS: FUNDAMENTOS	5	5	3	1	5	5	5	5	4	5	3	3	5	5	4	4	4	5
GENERADOR DE FUNCIONES	5	5	3	1	5	5	5	5	5	5	3	5	5	4	4	4	4	5
GRAFICANDO RECTAS	5	5	3	1	5	5	5	5	5	5	3	3	5	5	5	4	4	5
GRAVEDAD Y ÓRBITAS	5	5	3	1	5	5	5	5	5	4	3	4	4	4	4	4	4	5
GUSILETRA	1	2	1	1	3	3	3	3	3	2	3	1	3	2	2	2	3	3
HABILIDADES DE LECTURA Y ESCRITURA	1	2	2	1	2	3	1	2	2	2	2	2	2	1	2	2	1	3
HAZ UN DIEZ	2	2	2	1	3	3	3	2	3	3	3	3	3	3	2	2	3	5
JACK Y LA HABICHUELA MÁGICA	4	4	3	1	5	3	5	4	4	4	3	3	4	4	3	5	4	3
JUEGOLEC	4	4	3	1	5	5	5	5	4	4	3	3	3	4	4	4	4	3
LA CASA QUE PEDRO VA A HACER	4	4	3	1	4	4	3	3	3	4	3	3	4	3	3	4	4	3
LA GRANJA	4	4	4	1	5	4	4	3	4	4	3	3	4	4	4	4	4	3
LA NARANJA	4	4	3	1	4	5	4	4	4	4	3	3	4	4	3	4	4	3
LABORATORIO DE FUERZA DE GRAVEDAD	3	3	3	1	4	4	4	4	4	4	3	3	4	4	4	4	4	5
LEY DE EQUILIBRIO	5	5	3	1	5	5	5	5	5	5	3	4	5	5	5	4	4	5
LEY DE HOOKE	4	4	3	1	5	5	5	5	5	4	3	4	4	5	5	5	5	5
LEY DE OHM	3	3	3	1	4	4	4	4	4	4	3	3	4	4	4	4	4	5
LOS VERBOS-2	3	3	3	1	4	3	4	4	4	4	3	3	4	3	3	4	4	5
MATEMÁTICAS 1º DE PRIMARIA	4	4	3	1	4	4	4	4	4	4	3	3	4	4	3	4	4	5
MI SISTEMA SOLAR	3	3	3	1	4	5	5	5	4	5	3	4	4	4	4	4	4	5
MODELO DE ÁREAS: ÁLGEBRA	4	5	3	1	5	5	5	5	5	5	3	3	5	5	5	5	5	5
MODELO DE ÁREAS: DECIMALES	4	5	3	1	5	5	5	5	5	5	3	3	5	5	5	5	5	5
MODELO DE ÁREAS: INTRODUCCIÓN	4	5	3	1	5	5	5	5	5	5	3	3	5	5	5	5	5	5
MODELO DE ÁREAS: MULTIPLICACIÓN	4	5	3	1	5	5	5	5	5	5	3	3	5	5	5	5	5	5
ONDA EN UNA CUERDA	5	5	3	1	5	5	5	5	5	5	3	3	5	4	5	4	5	5
PAREJAS DE FRACCIONES	5	5	3	1	5	5	5	5	5	5	3	3	5	5	5	4	4	5
PISTA DE JUEGO DE PROPORCIONES	4	4	3	1	4	4	5	4	4	4	3	3	3	4	4	4	4	5
PROBABILIDAD PLINKO	4	4	3	1	4	4	5	4	4	5	3	3	4	4	5	4	5	5
PROBLE+	5	5	3	3	5	5	5	5	5	5	4	4	5	4	5	5	5	5
PROPORCIONALIDAD	3	3	3	1	2	4	4	3	2	2	2	2	2	2	3	2	2	3
RAZÓN UNITARIA	5	5	3	1	5	5	5	5	5	5	3	3	4	5	5	5	4	5
LA RAMPA	4	4	3	1	4	5	5	5	5	5	4	4	4	5	4	4	4	5
CANTALETRAS	5	5	3	1	5	5	5	5	5	5	3	3	5	5	5	5	5	5
CHILDSPLAY	5	5	3	3	5	5	5	5	5	5	3	3	5	5	5	4	5	5
COMIDA Y EJERCICIO	4	4	3	1	5	4	5	5	5	4	3	3	3	5	3	4	4	5
COMPRAS CON MONEDAS	4	4	3	1	5	5	5	5	5	5	3	3	5	5	3	3	4	5
CONSTRUYE UNA MOLÉCULA	4	4	3	1	5	5	5	5	5	5	4	4	5	5	5	5	5	5
CUÉNTAME	5	5	3	3	4	2	4	4	4	4	3	3	4	4	4	4	4	5
CYBERSTART FOR CHILDREN	5	5	3	1	5	5	5	4	4	4	3	3	4	3	4	3	4	5
EL HOMBRE MÓVIL	3	3	1	5	4	5	5	5	4	4	3	3	5	5	4	3	3	5
ESTÍMULOS	4	4	3	2	4	4	4	4	4	4	3	3	4	4	4	4	4	5
EVO	3	3	2	1	3	3	1	3	2	3	3	3	3	2	2	2	2	5
FRACTIONS INTRO	5	5	3	1	5	5	5	5	5	5	4	5	5	5	4	4	4	5
GLACIARES	2	3	1	4	4	5	4	4	4	3	3	4	3	3	3	3	4	5
GLOBUS	4	4	3	3	5	4	4	4	4	4	3	3	4	4	3	3	3	5
IMANES Y ELECTROIMANES	4	4	3	1	5	5	5	5	5	5	3	3	5	5	5	5	5	5
MECANOG	2	3	2	2	3	3	3	3	3	2	2	2	3	2	1	2	3	3
MIRAR Y TOCAR	3	4	5	3	5	4	4	4	4	4	3	3	4	4	3	3	3	5
MOVIMIENTO 2D	4	3	3	1	4	4	5	5	5	4	3	3	4	3	3	4	4	5
MOVIMIENTO DE MARIQUITA	4	4	3	1	5	5	5	5	5	5	4	4	5	5	5	4	5	5
OPERACIONES CON DECIMALES	5	5	3	1	5	5	3	3	3	4	3	3	4	4	4	4	4	4
PISTA DE PATINAR	5	5	3	1	5	5	5	5	5	4	4	4	5	5	5	3	4	5
RAMPA: FUERZAS Y MOVIMIENTO	5	5	3	1	5	5	5	5	5	5	3	3	5	5	3	4	4	5
SNAP + CORE FIRST	5	5	5	3	5	5	5	5	5	5	4	4	5	5	5	5	5	4
SOLUCIONES DE AZÚCAR Y SAL	5	5	3	1	5	5	3	4	5	5	3	4	5	5	3	3	3	5
STORYBOARDTHAT	4	4	3	3	4	4	3	3	3	4	4	4	3	3	3	4	4	5
TECTÓNICA DE PLACAS	4	4	3	1	4	4	5	4	4	4	3	3	4	4	4	3	4	5
VOCALIZA	4	5	3	4	4	4	5	5	4	4	3	2	4	5	5	3	4	5
VOCALIZA 2	4	5	3	4	4	4	5	5	4	4	3	2	4	5	5	3	4	5
CONSTRUYE UNA FRACCIÓN	4	4	3	1	4	4	3	4	4	4	3	3	4	3	3	3	3	5
RESISTENCIA EN UN ALAMBRE	3	3	2	1	3	3	4	4	4	3	3	3	3	2	2	2	3	5
SOLUCIONES ÁCIDO-BASE	3	3	3	1	4	4	4	4	4	4	3	3	3	3	3	3	3	5
EL EFECTO INVERNADERO	5	5	3	1	5	5	5	5	5	4	5	5	5	4	5	3	4	5
FUERZAS EN 1 DIMENSIÓN	3	3	3	1	4	4	4	4	4	3	3	3	4	3	3	3	3	5
KATALUGA	4	4	3	1	4	3	4	4	3	4	3	2	3	3	3	3	3	4
KIT DE CONSTRUCCIÓN DE CIRCUITOS	5	5	3	1	5	5	5	5	5	5	4	4	5	5	5	4	4	5
MIDAS TOUCH	3	4	5	3	5	4	4	4	4	4	3	3	4	4	3	3	3	5
MINISEBRAN	4	4	3	1	3	4	4	4	4	4	3	3	3	3	3	3	3	5
PRELINGUA	5	5	4	4	5	4	4	5	4	4	2	2	4	3	3	3	4	4
PRESIÓN DE FLUIDO Y FLUJO	4	4	3	1	5	4	5	5	5	5	4	4	4	4	5	3	4	5
PROPIEDADES DE LOS GASES	3	3	3	1	4	4	5	4	4	4	3	3	4	4	3	3	4	5
REFOCAS	4	4	4	2	3	2	3	3	3	3	3	3	2	2	2	2	3	4
REVOLUCIÓN DE LA MARIQUITA	4	4	3	1	5	5	5	5	5	5	4	4	5	5	5	4	5	5
SALES Y SOLUBILIDAD	4	4	3	1	4	3	5	4	4	3	3	3	4	4	3	3	4	5
SEBRAN	5	5	3	1	5	5	5	5	4	3	3	5	5	5	5	5	5	5
SELECCIÓN NATURAL	5	5	3	1	5	5	5	4	5	4	3	3	5	4	4	4	4	5
SIGUIENDO EL RASTRO DE LAS LETRAS	4	4	3	1	4	4	5	5	4	3	3	5	5	5	4	4	4	4
VOLTAJE DE BATERÍA	2	3	3	1	3	4	4	4	3	3	3	3	3	3	2	2	3	5
REFLEXIÓN Y REFRACCIÓN	5	5	3	1	4	4	4	4	4	5	3	3	4	4	4	4	4	5
TANGRAM	5	5	3	1	5	5	5	4	4	4	3	3	4	5	5	5	5	2
PLAPHOONS	2	2	2	1	2	2	1	2	2	3	3	3	2	2	2	2	1	4
MATEMÁTICAS CON GRIN 456	5	5	3	3	5	5	5	5	5	5	3	3	5	5	5	5	5	5
FANTASTIC 4 IN A ROW	5	5	3	2	5	5	5	5	5	5	4	4	5	5	5	2	4	5
KELY SUMAR Y RESTAR (VERSION MEJORADA " MATEMÁTICAS CON GRIN 456" )	5	5	3	3	5	5	5	5	5	5	3	3	5	5	5	5	5	5
GEOGEBRA	5	5	3	1	4	5	4	5	5	5	3	3	5	5	5	4	4	5
DUOLINGO	4	4	3	3	4	5	5	5	5	5	4	4	5	5	5	5	5	5
JOSÉ APRENDE cuentos	2	2	1	1	3	3	4	4	3	3	3	3	2	2	2	2	3	5
OBJETOS ESCONDIDOS - MYSTERY SOCIETY	5	5	5	5	3	5	5	5	5	5	5	5	5	5	5	4	4	4
KDENLIVE	3	3	2	1	3	3	2	3	3	2	3	3	3	2	3	2	3	4
KIDSPIRATION	5	5	3	1	5	5	5	5	5	4	3	3	4	4	4	4	4	4
GCOMPRIS	5	5	3	1	5	5	5	5	5	5	4	4	5	5	5	5	5	5
INSPIRATION	5	5	3	1	5	5	5	5	5	4	3	3	4	4	4	4	4	4
AUDACITY	4	4	3	1	4	3	4	4	4	4	3	3	3	3	3	4	4	4
